# Supplementary material for: Identification of Novel Gene Targets and Functions of p21-Activated Kinase 1 during DNA Damage by Gene Expression Profiling
Source: PLoS One. 2013 Aug 12;8(8):e66585. doi: 10.1371/journal.pone.0066585 (PMC3741304; doi:10.1371/journal.pone.0066585)
Supplement: Table S4 — Gene Ontology terms for Pak1 influenced DNA damage response genes. (XLSX) [file pone.0066585.s004.xlsx]

## Sheet: go tree spreadsheet pak ir
GO ACCESSION	GO Term	p-value	corrected p-value	Count in Selection	% Count in Selection	Count in Total	% Count in Total
	Cellular Component
GO:0005622	intracellular	3.29023e-07	0.00032818	61	61	11034	40.3437
GO:0005623	cell	3.26948e-07	0.00032818	61	61	15592	57.0091
GO:0044464	cell part	3.25238e-07	0.00032818	61	61	15591	57.0055
GO:0044424	intracellular part	3.48397e-07	0.00032818	54	54	10777	39.404
GO:0005737	cytoplasm	1.14127e-06	0.000793059	53	53	7665	28.0256
	Molecular Function
GO:0005488	binding	1.71036e-05	0.00693303	7	7	11818	43.2102
	Biological Process
GO:0042127	regulation of cell proliferation	4.99641e-14	9.72152e-10	27	27	710	2.59598
GO:0048522|GO:0051242	positive regulation of cellular process	1.45215e-12	1.41273e-08	24	24	1841	6.73126
GO:0048518|GO:0043119	positive regulation of biological process	4.18774e-12	2.71603e-08	25	25	2059	7.52834
GO:0048519|GO:0043118	negative regulation of biological process	8.2383e-11	4.00732e-07	20	20	1758	6.42779
GO:0009987|GO:0008151|GO:0050875	cellular process	6.74103e-10	2.22757e-06	31	31	10555	38.5923
GO:0048523|GO:0051243	negative regulation of cellular process	6.86921e-10	2.22757e-06	18	18	1569	5.73675
GO:0006950	response to stress	6.27171e-09	1.74327e-05	6	6	1388	5.07495
GO:0008219	cell death	8.32575e-09	2.02493e-05	19	19	635	2.32176
GO:0016265	death	1.03425e-08	2.23593e-05	19	19	643	2.35101
GO:0008284	positive regulation of cell proliferation	1.20359e-08	2.34182e-05	15	15	418	1.52834
GO:0042981	regulation of apoptosis	7.1059e-08	0.00012569	18	18	720	2.63254
GO:0043067|GO:0043070	regulation of programmed cell death	8.74867e-08	0.000141853	18	18	729	2.66545
GO:0043068|GO:0043071	positive regulation of programmed cell death	1.04263e-07	0.000152606	14	14	321	1.17367
GO:0010941	regulation of cell death	1.09805e-07	0.000152606	18	18	739	2.70201
GO:0010942	positive regulation of cell death	1.25995e-07	0.000163432	14	14	326	1.19196
GO:0012501|GO:0016244	programmed cell death	2.88705e-07	0.00032818	16	16	584	2.13528
GO:0043085	positive regulation of catalytic activity	3.54206e-07	0.00032818	2	2	355	1.29799
GO:0044093	positive regulation of molecular function	4.87087e-07	0.000430784	2	2	421	1.53931
GO:0043065	positive regulation of apoptosis	6.49325e-07	0.000549301	13	13	319	1.16636
GO:0051726|GO:0000074	regulation of cell cycle	7.12715e-07	0.000577805	8	8	270	0.987203
GO:2000026	regulation of multicellular organismal development	7.69413e-07	0.000598819	4	4	625	2.28519
GO:0050794|GO:0051244	regulation of cellular process	9.09604e-07	0.000680699	46	46	7505	27.4406
GO:0006915|GO:0008632	apoptosis	1.10713e-06	0.000793059	15	15	575	2.10238
GO:0031323	regulation of cellular metabolic process	2.0544e-06	0.00133241	20	20	3134	11.4589
GO:0050896|GO:0051869	response to stimulus	2.00732e-06	0.00133241	11	11	2831	10.351
GO:0050793	regulation of developmental process	2.40384e-06	0.00150876	5	5	748	2.73492
GO:0007050	cell cycle arrest	3.56171e-06	0.00210001	6	6	57	0.208409
GO:0019222	regulation of metabolic process	4.09801e-06	0.00234515	23	23	3949	14.4388
GO:0065009	regulation of molecular function	4.76331e-06	0.00264799	2	2	1340	4.89945
GO:0048731	system development	5.68204e-06	0.00307099	3	3	2164	7.91225
GO:0050790	regulation of catalytic activity	7.30011e-06	0.00383887	2	2	1204	4.40219
GO:0008152	metabolic process	8.29807e-06	0.00424883	12	12	8519	31.1481
GO:0065007	biological regulation	1.01057e-05	0.00479159	48	48	8557	31.287
GO:0050789|GO:0050791	regulation of biological process	9.90136e-06	0.00479159	48	48	8176	29.894
GO:0032502	developmental process	1.03431e-05	0.00479159	12	12	3122	11.415
GO:0009653	anatomical structure morphogenesis	1.30342e-05	0.00589782	4	4	1247	4.55942
GO:0071840	cellular component organization or biogenesis	1.69462e-05	0.00693303	5	5	2473	9.04205
GO:0048513	organ development	2.11169e-05	0.00792635	3	3	1639	5.99269
GO:0016525	negative regulation of angiogenesis	2.11836e-05	0.00792635	4	4	23	0.0840951
GO:0008285	negative regulation of cell proliferation	2.53021e-05	0.00863691	9	9	265	0.968921
GO:0048856	anatomical structure development	2.40536e-05	0.00863691	5	5	2513	9.1883
GO:0007275	multicellular organismal development	2.80897e-05	0.00927674	11	11	2835	10.3656
GO:0071841	cellular component organization or biogenesis at cellular level	2.91939e-05	0.00946711	5	5	1669	6.10238
GO:0009628	response to abiotic stimulus	4.68126e-05	0.0146909	5	5	285	1.04205
GO:0051239	regulation of multicellular organismal process	5.33526e-05	0.0162216	4	4	1101	4.02559
GO:0045786	negative regulation of cell cycle	5.33578e-05	0.0162216	6	6	91	0.332724
GO:0043170|GO:0043283	macromolecule metabolic process	5.92697e-05	0.0176635	1	1	5251	19.1993
GO:0006807	nitrogen compound metabolic process	6.36062e-05	0.0181998	1	1	3796	13.8793
GO:0016043	cellular component organization	7.19489e-05	0.0202886	5	5	2342	8.56307
GO:0006917	induction of apoptosis	7.72761e-05	0.0205967	7	7	190	0.694698
GO:0012502|GO:0012503	induction of programmed cell death	7.72761e-05	0.0205967	7	7	190	0.694698
GO:0008637	apoptotic mitochondrial changes	8.17511e-05	0.021495	4	4	32	0.117002
GO:0048661	positive regulation of smooth muscle cell proliferation	9.25023e-05	0.0239976	4	4	33	0.120658
GO:0002009	morphogenesis of an epithelium	0.000101207	0.0255739	1	1	253	0.925046
GO:0048729	tissue morphogenesis	0.000110131	0.0272095	1	1	316	1.15539
GO:0001558	regulation of cell growth	0.000110477	0.0272095	1	1	149	0.54479
GO:0007005	mitochondrion organization	0.000112379	0.027332	5	5	104	0.380256
GO:0051093	negative regulation of developmental process	0.00013561	0.0321777	4	4	263	0.961609
GO:0071842	cellular component organization at cellular level	0.00014872	0.0344483	5	5	1549	5.66362
GO:0032582	negative regulation of gene-specific transcription	0.000162212	0.0358655	1	1	38	0.13894
GO:0043066	negative regulation of apoptosis	0.000181221	0.039178	6	6	336	1.22852
GO:0009411	response to UV	0.000179733	0.039178	4	4	39	0.142596
GO:0043069|GO:0043072	negative regulation of programmed cell death	0.000204052	0.0431548	6	6	341	1.2468
GO:0009887	organ morphogenesis	0.000215239	0.0440832	3	3	554	2.02559
GO:0060255	regulation of macromolecule metabolic process	0.000214734	0.0440832	22	22	2898	10.596
GO:0010467	gene expression	0.000220791	0.0447494	1	1	2902	10.6106
GO:0060548	negative regulation of cell death	0.000240041	0.0471767	6	6	348	1.27239
GO:0010556	regulation of macromolecule biosynthetic process	0.000279697	0.0528356	20	20	2515	9.19561
GO:0060429	epithelium development	0.000274991	0.0528356	1	1	354	1.29433
GO:0006357	regulation of transcription from RNA polymerase II promoter	0.000284928	0.0533062	2	2	727	2.65814
GO:0008629	induction of apoptosis by intracellular signals	0.000314735	0.0572318	3	3	45	0.164534
GO:0048660	regulation of smooth muscle cell proliferation	0.000314735	0.0572318	4	4	45	0.164534
GO:0022402	cell cycle process	0.00034617	0.0617929	6	6	434	1.58684
GO:0030154	cell differentiation	0.000410414	0.0712986	6	6	1853	6.77514
GO:2000112	regulation of cellular macromolecule biosynthetic process	0.000426537	0.0713051	20	20	2469	9.02742
GO:0080090	regulation of primary metabolic process	0.000482202	0.078185	20	20	3019	11.0384
GO:0045768	positive regulation of anti-apoptosis	0.000519959	0.082925	3	3	22	0.0804388
GO:0009314	response to radiation	0.000582006	0.0911218	5	5	141	0.515539
GO:0006996	organelle organization	0.000599454	0.0911218	5	5	1223	4.47166
GO:0048869	cellular developmental process	0.000597994	0.0911218	6	6	1899	6.94333
GO:0001836	release of cytochrome c from mitochondria	0.000594775	0.0911218	3	3	23	0.0840951
GO:0031326	regulation of cellular biosynthetic process	0.000658035	0.0974146	20	20	2637	9.64168
